# Supplementary material
Source: publisher figshare collection journal article supplement (https://future-science-group.figshare.com/ndownloader/files/28253538)
Supplement: Supplementary file 1 [file 28253538]

Figure E1a. Selection process for comparison one

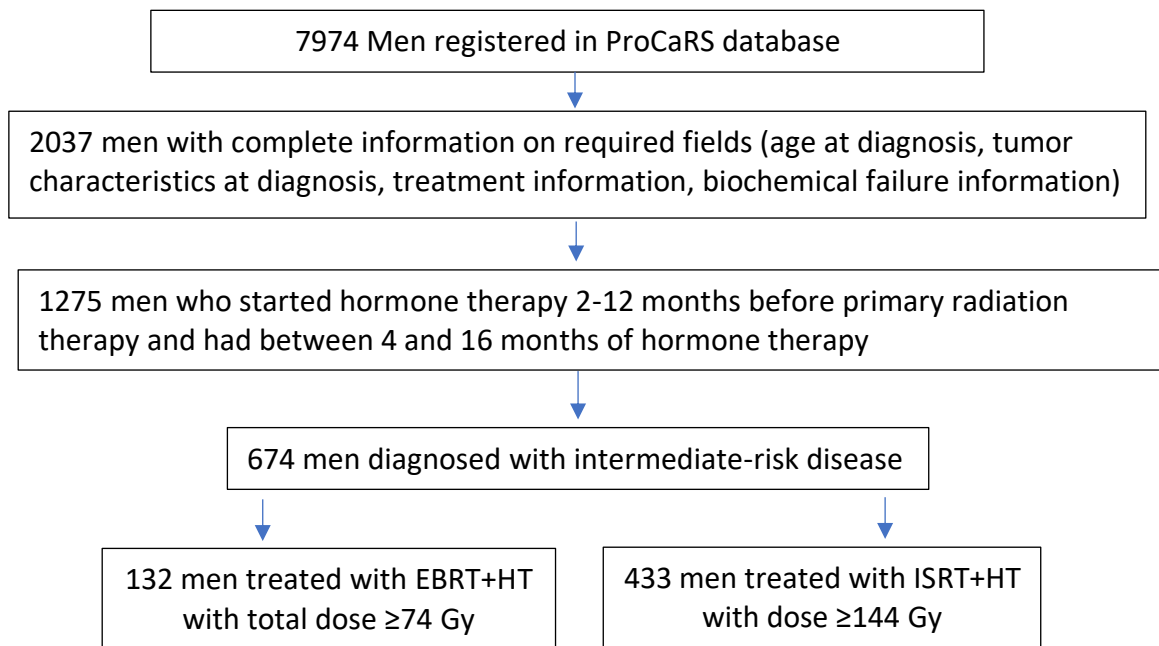

Figure E1b. Selection process for comparison two

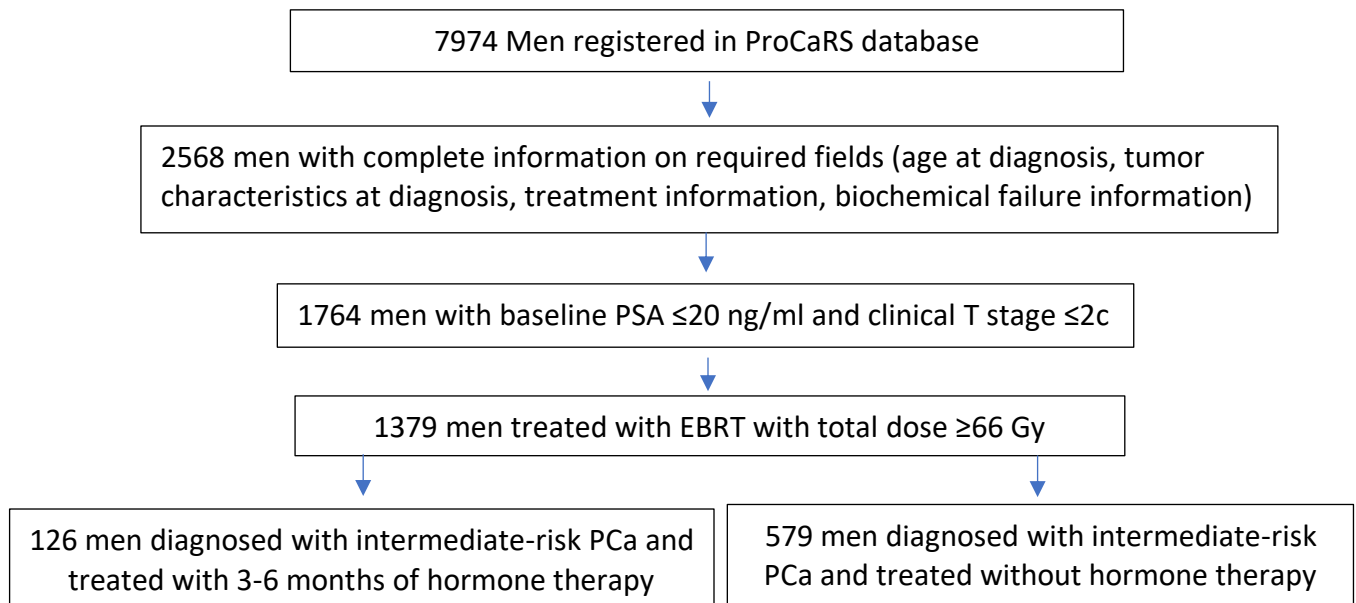

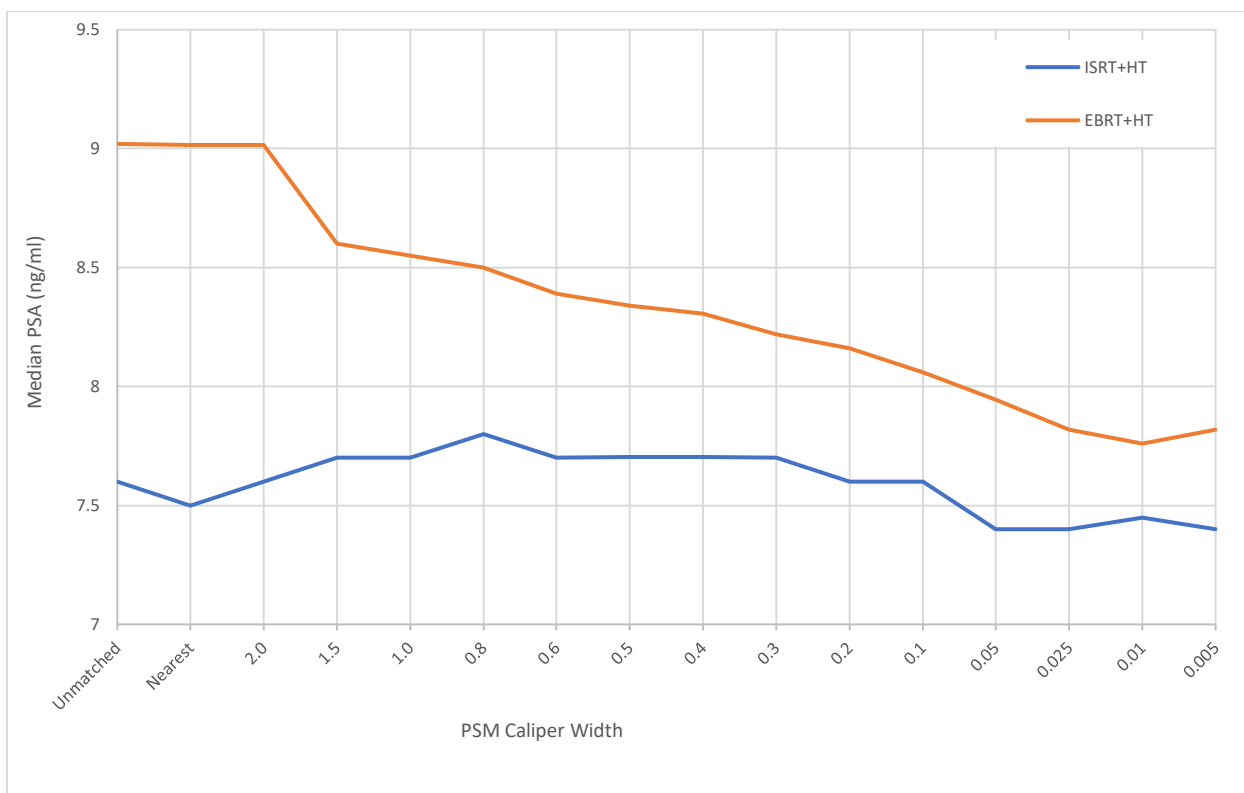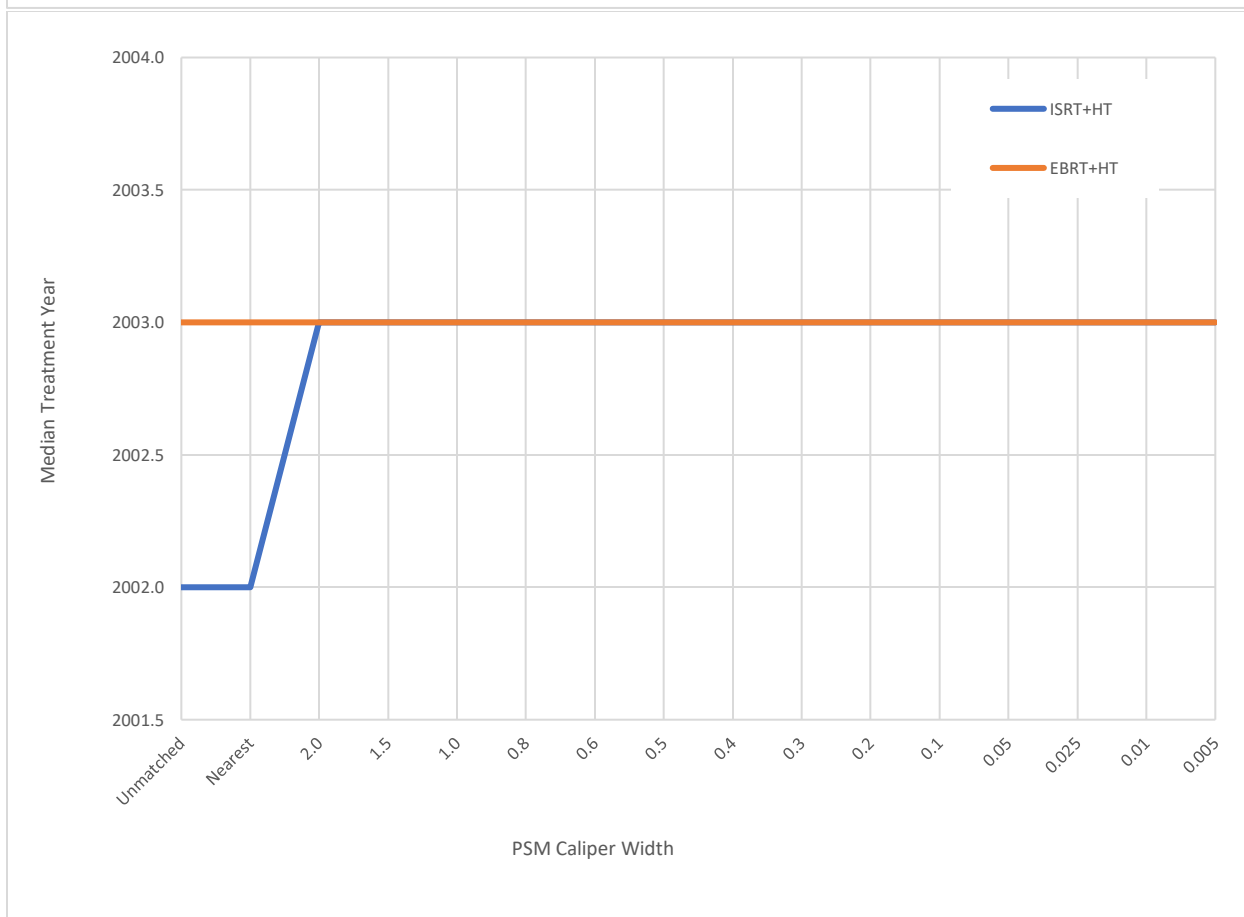

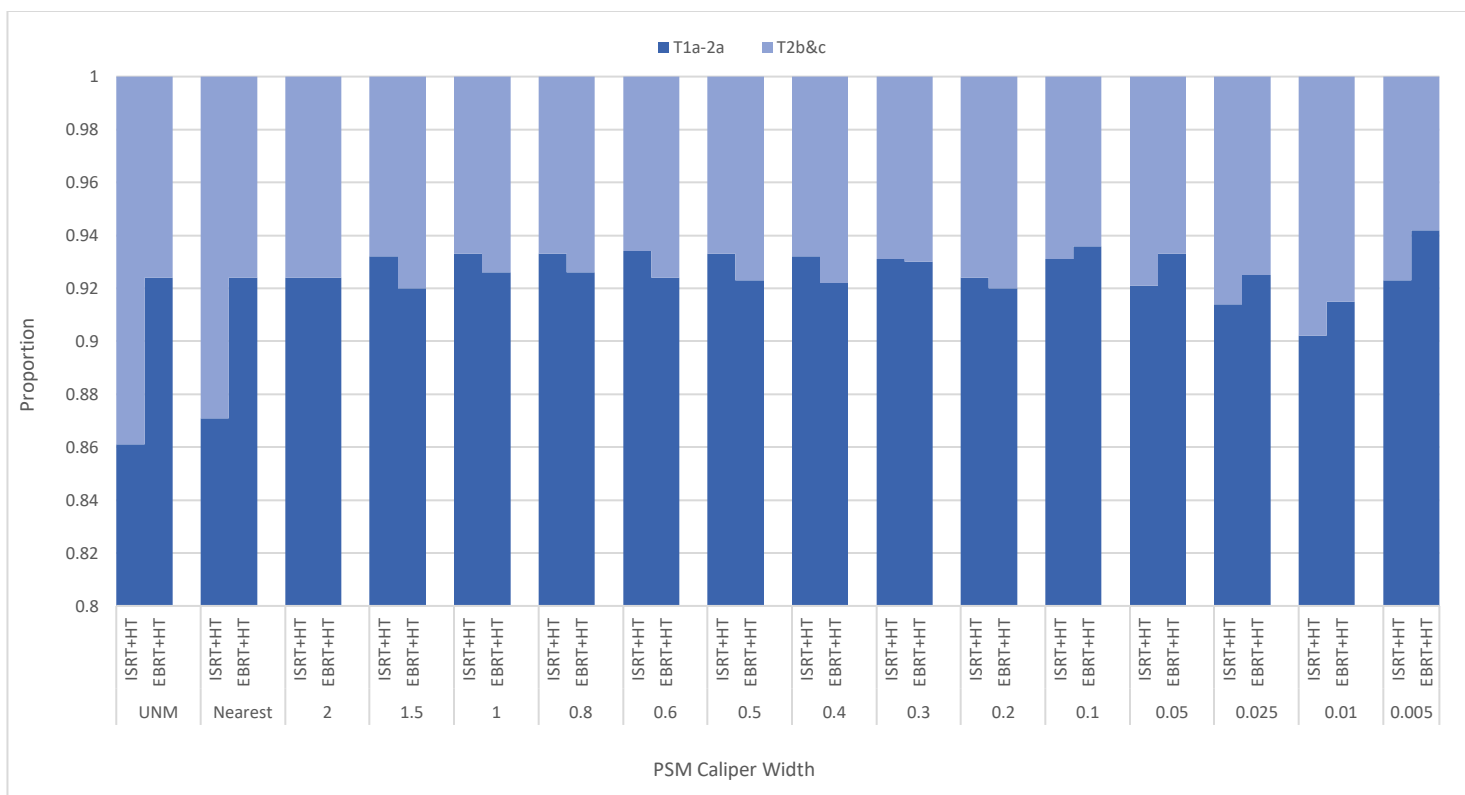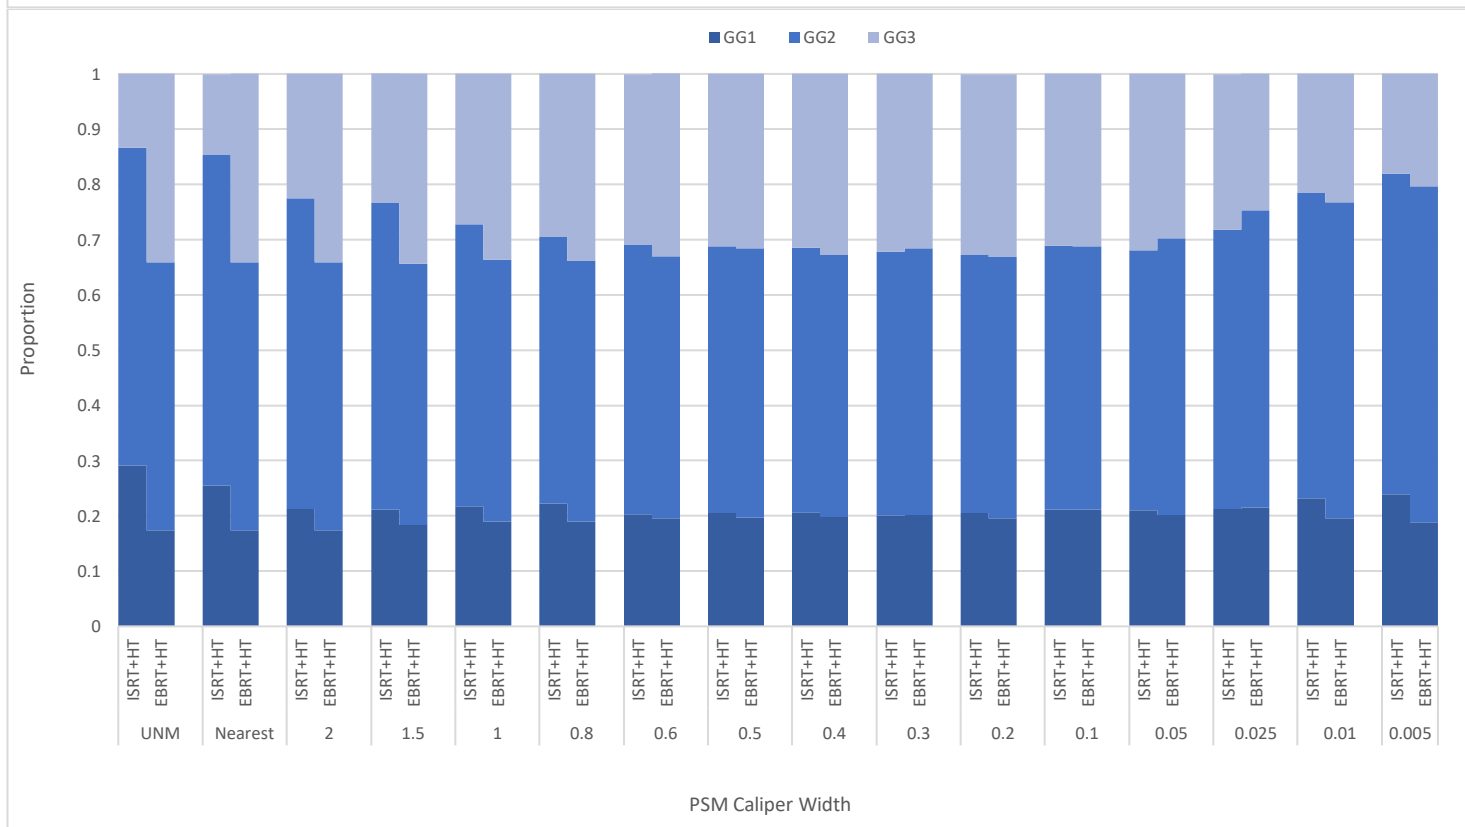

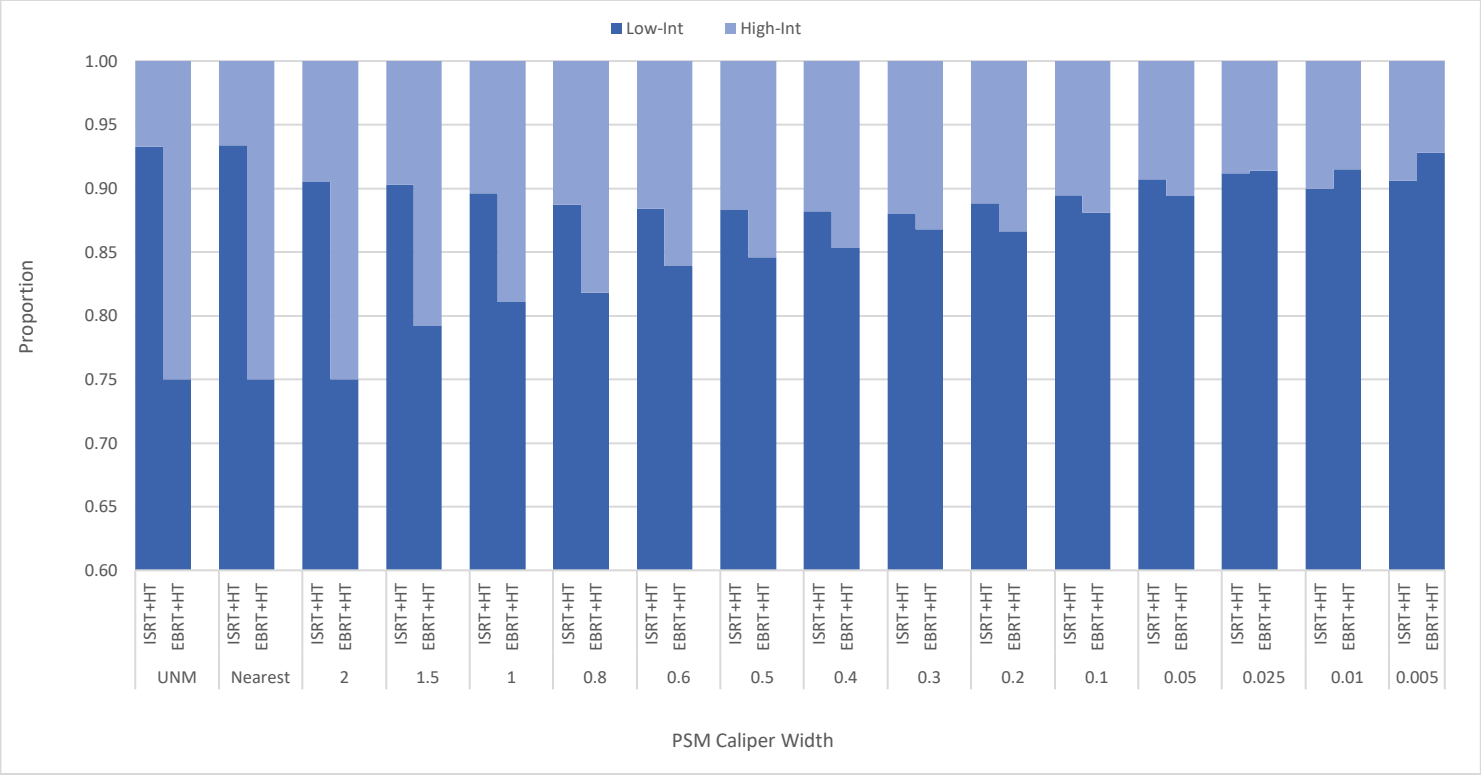

Figure E2a. Distribution of baseline covariates by PSM caliper width for comparison one

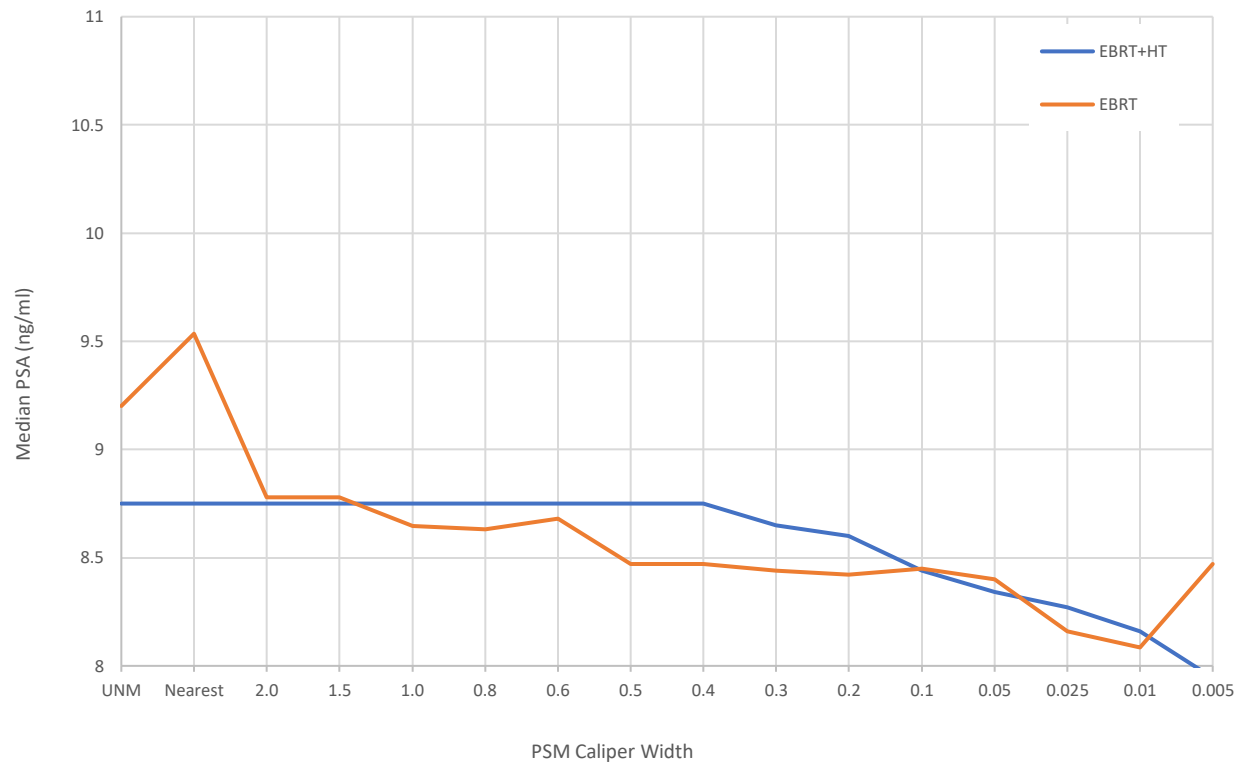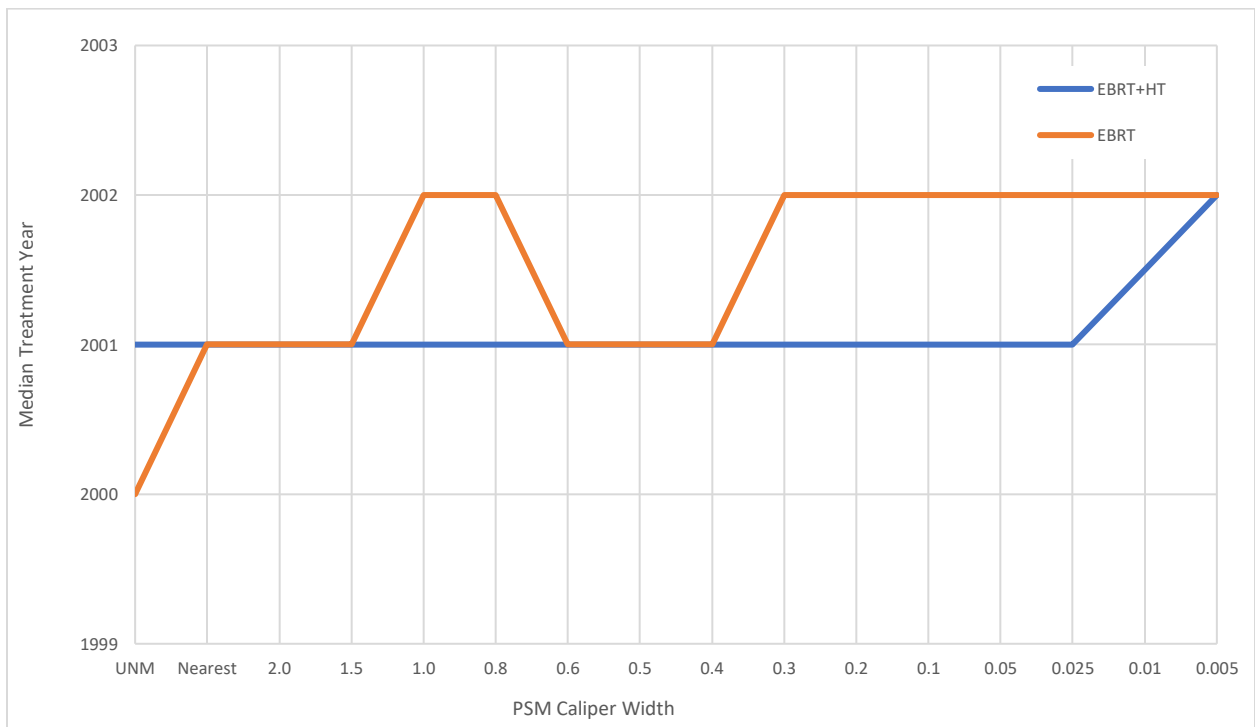

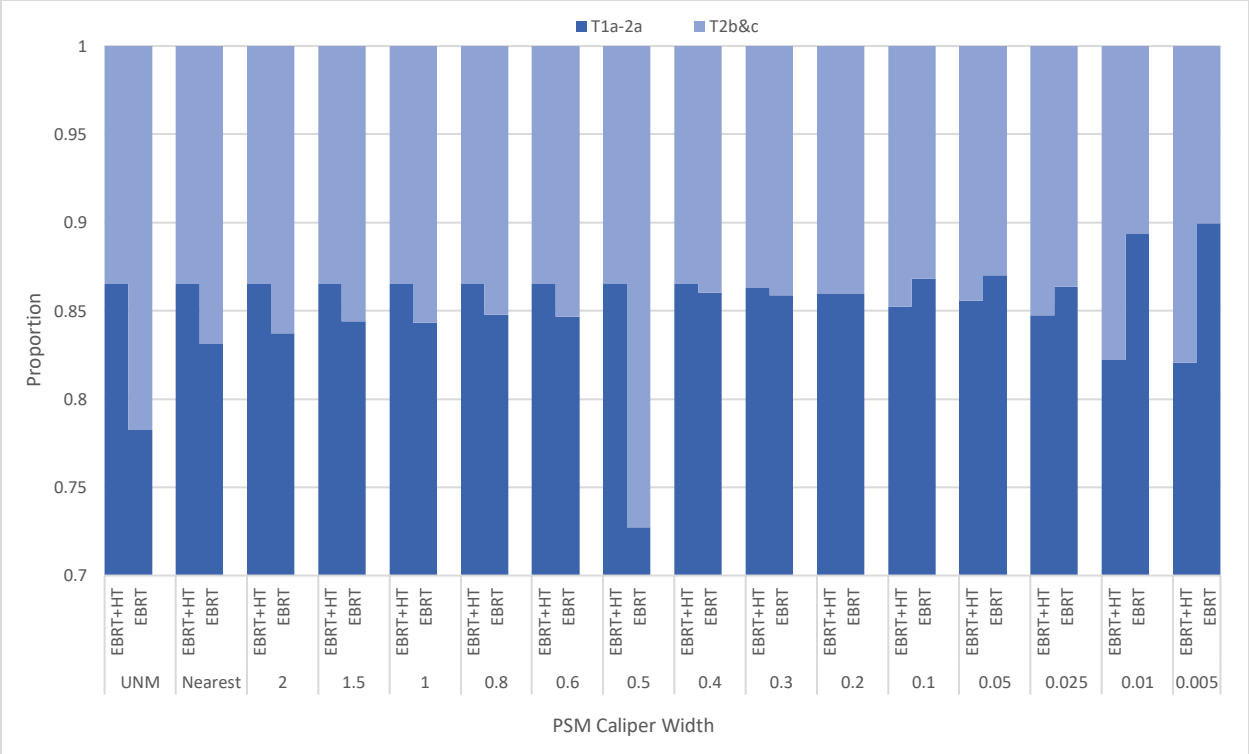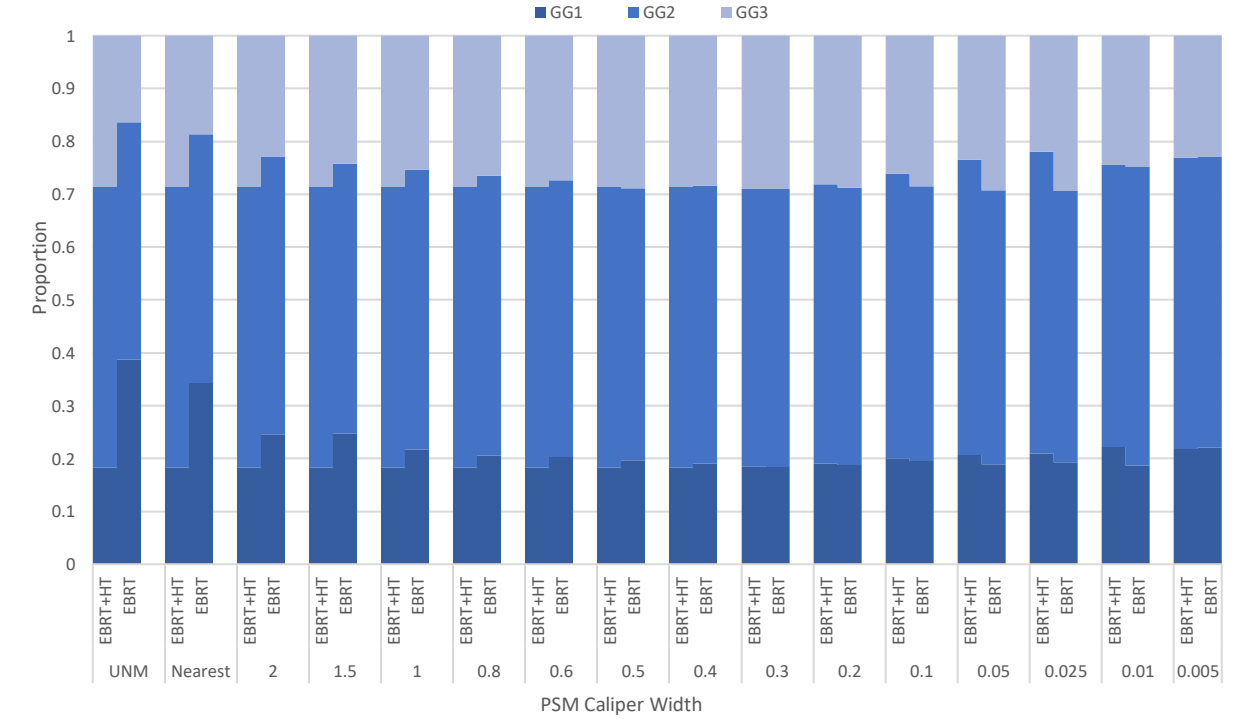

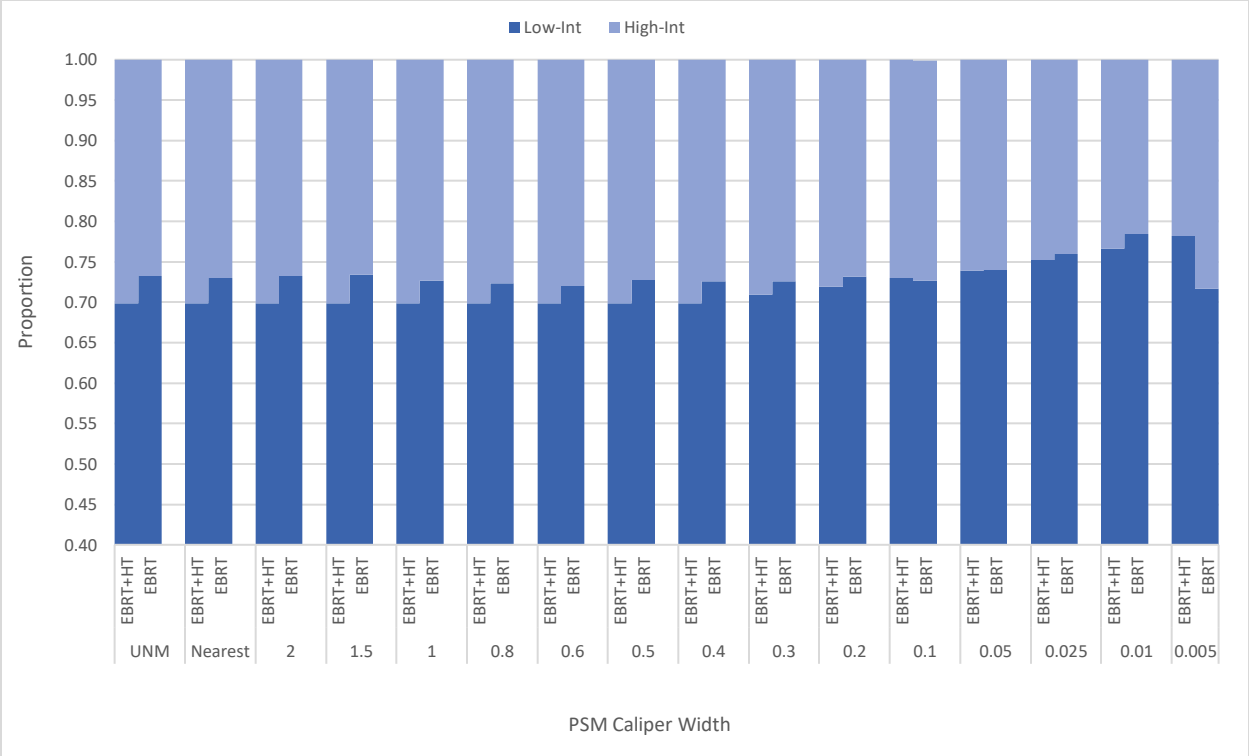

Figure E2b. Distribution of baseline covariates by PSM caliper width for comparison two



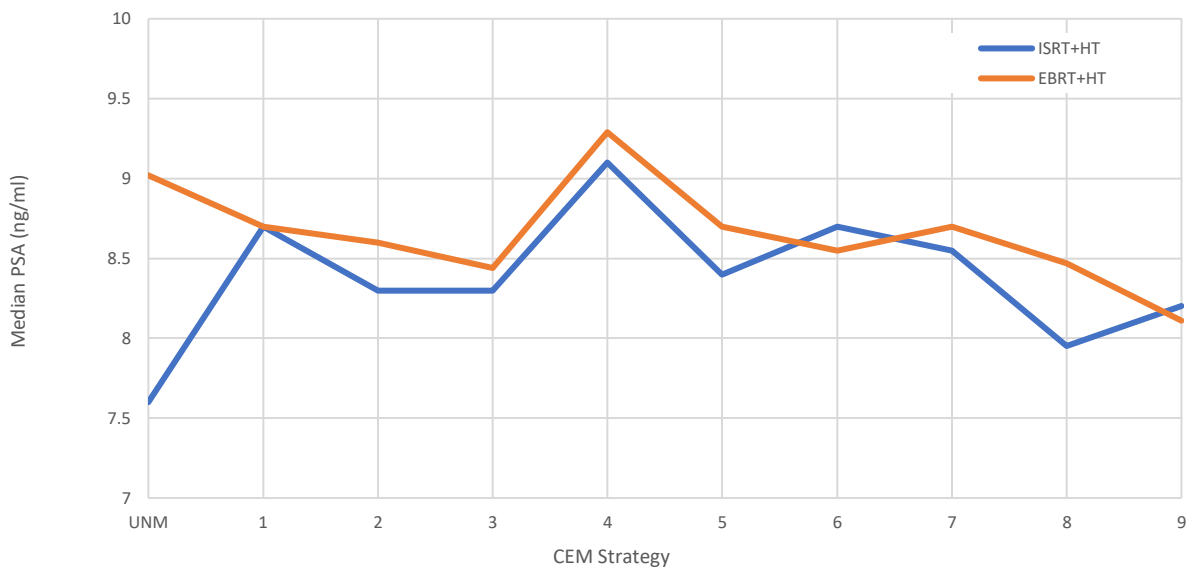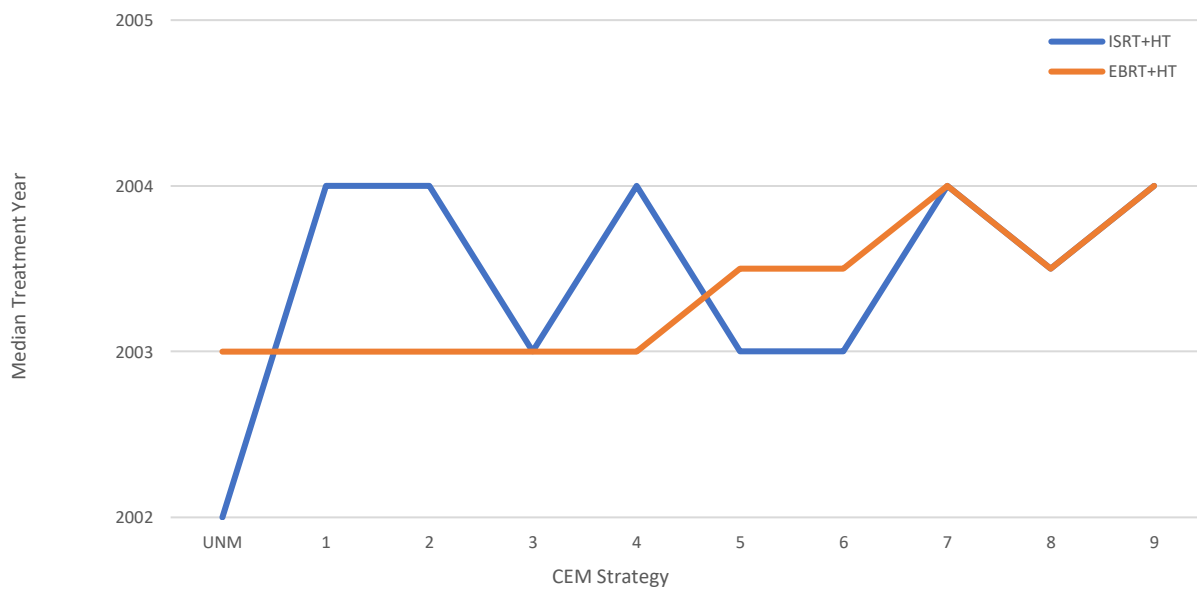

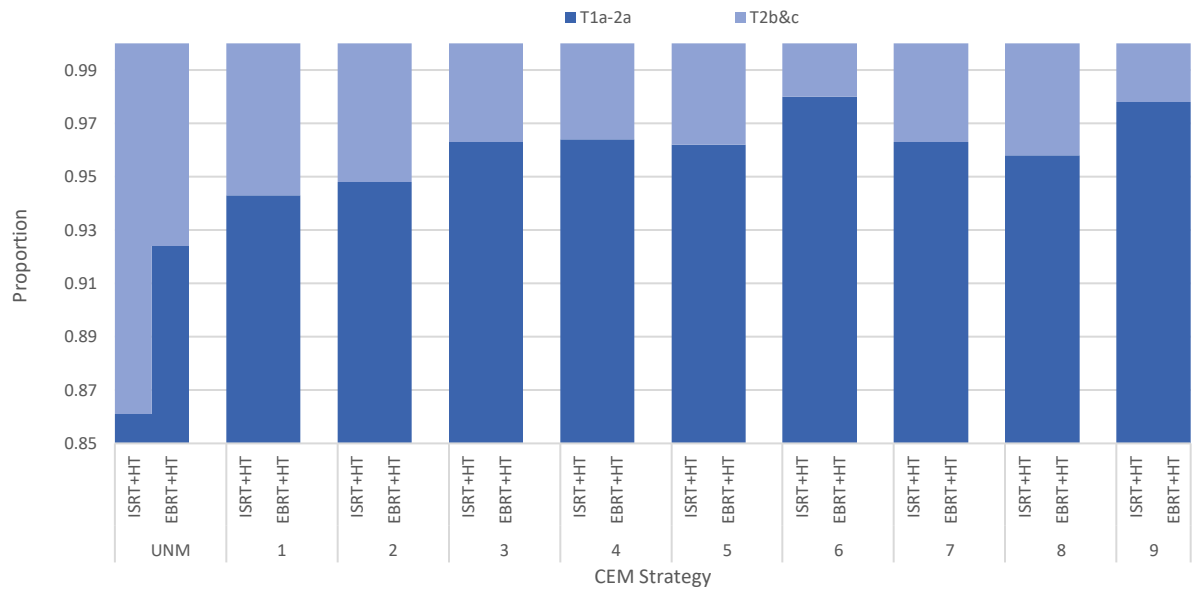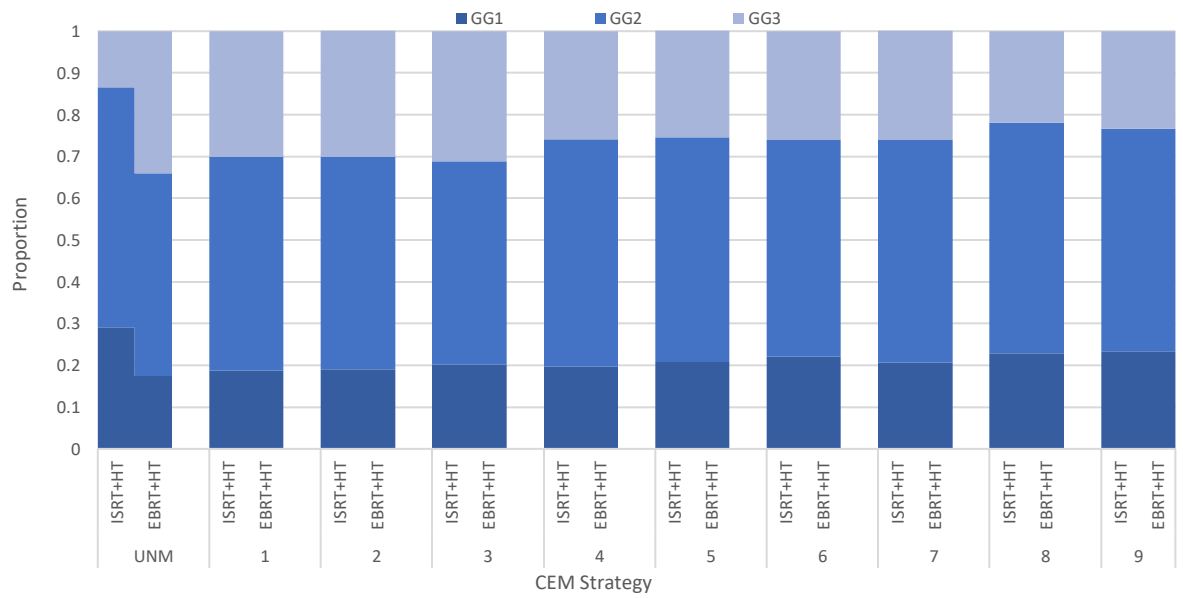

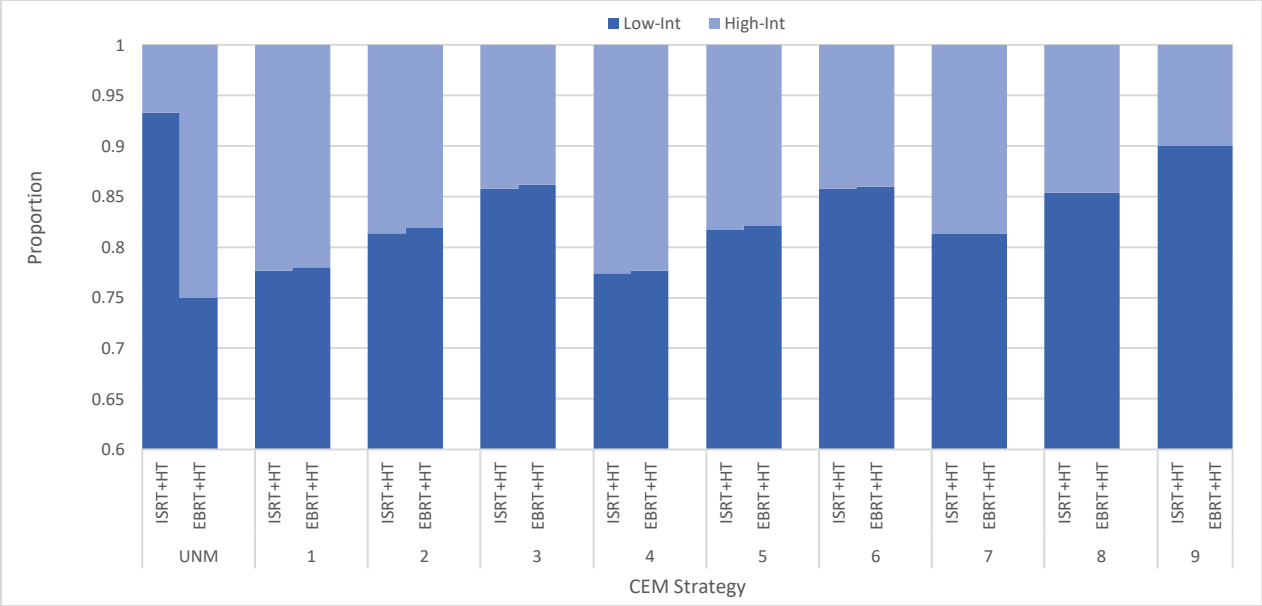

Figure E3a. Distribution of baseline covariates by CEM strategy for comparison one

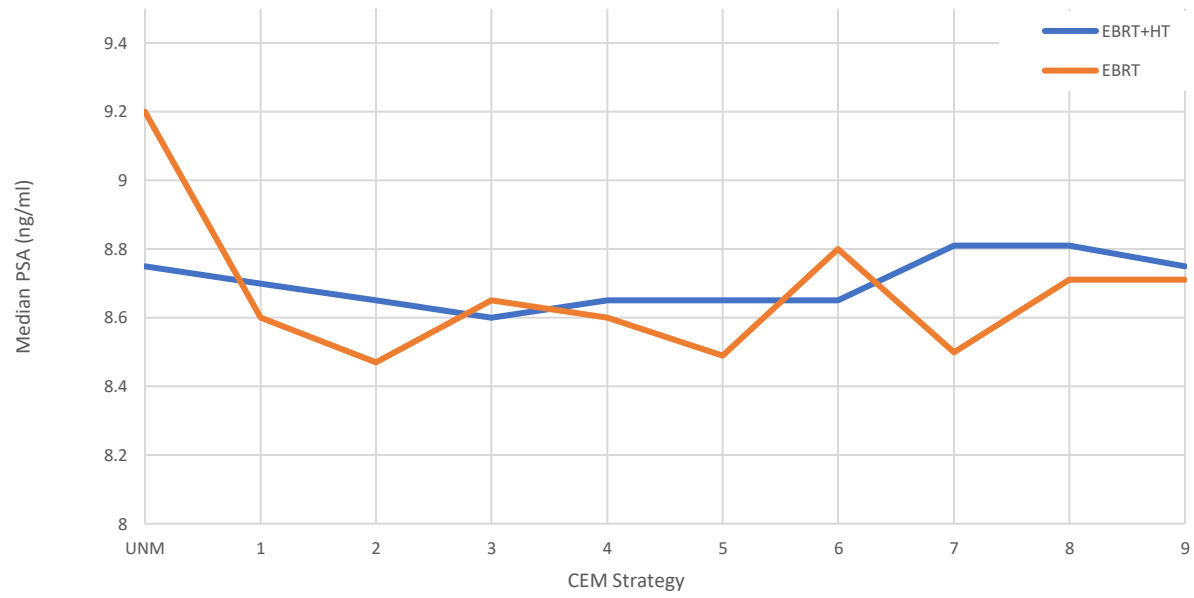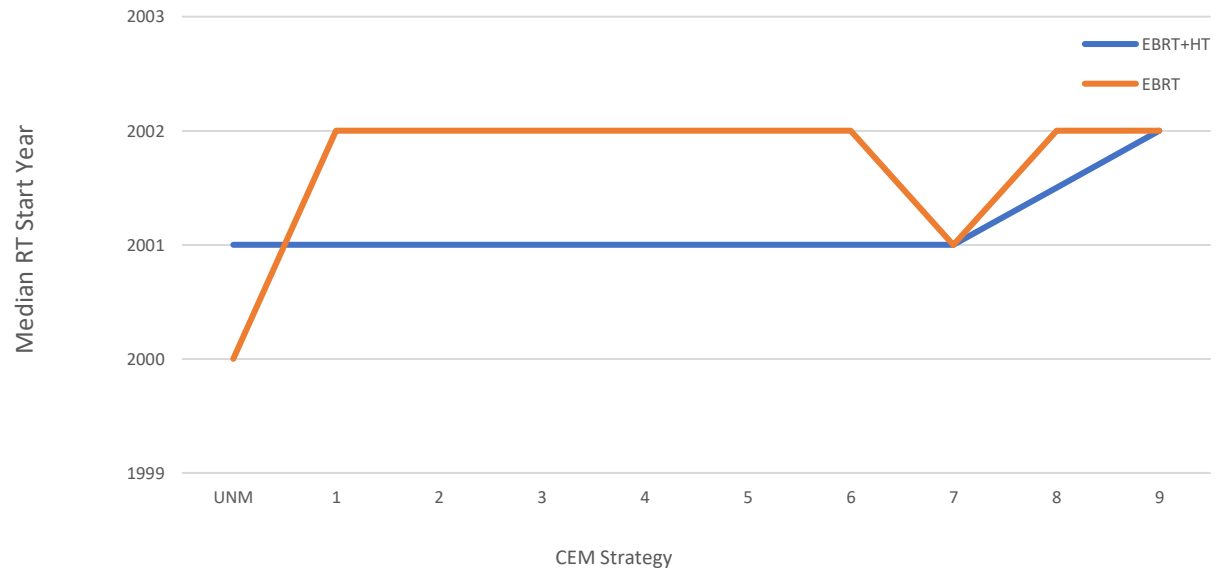

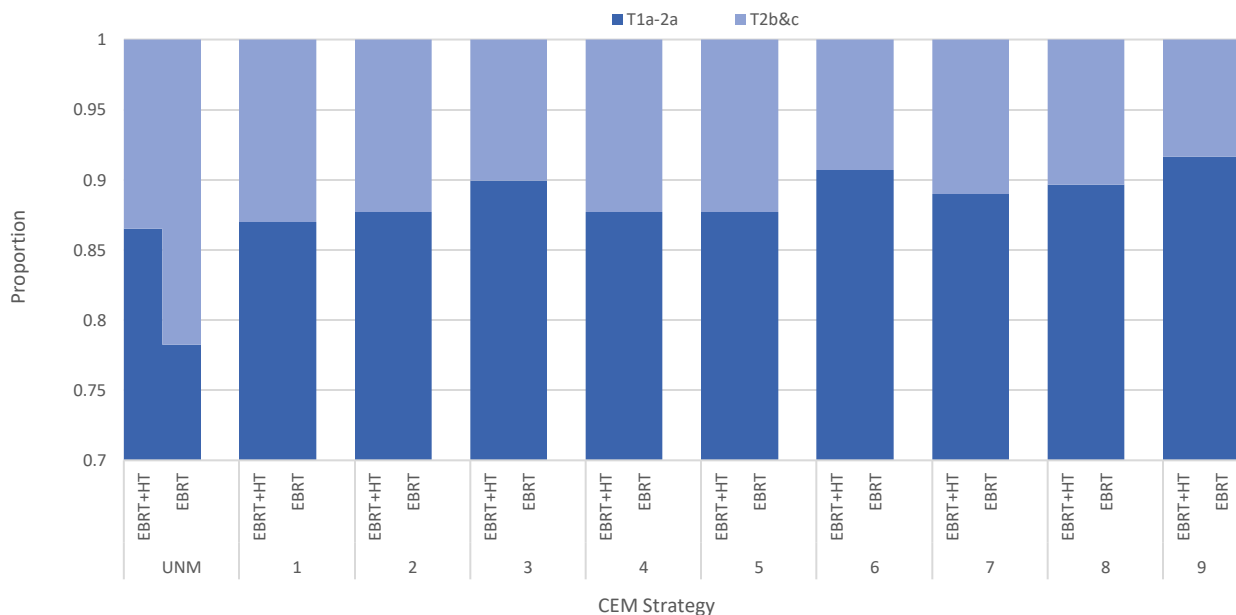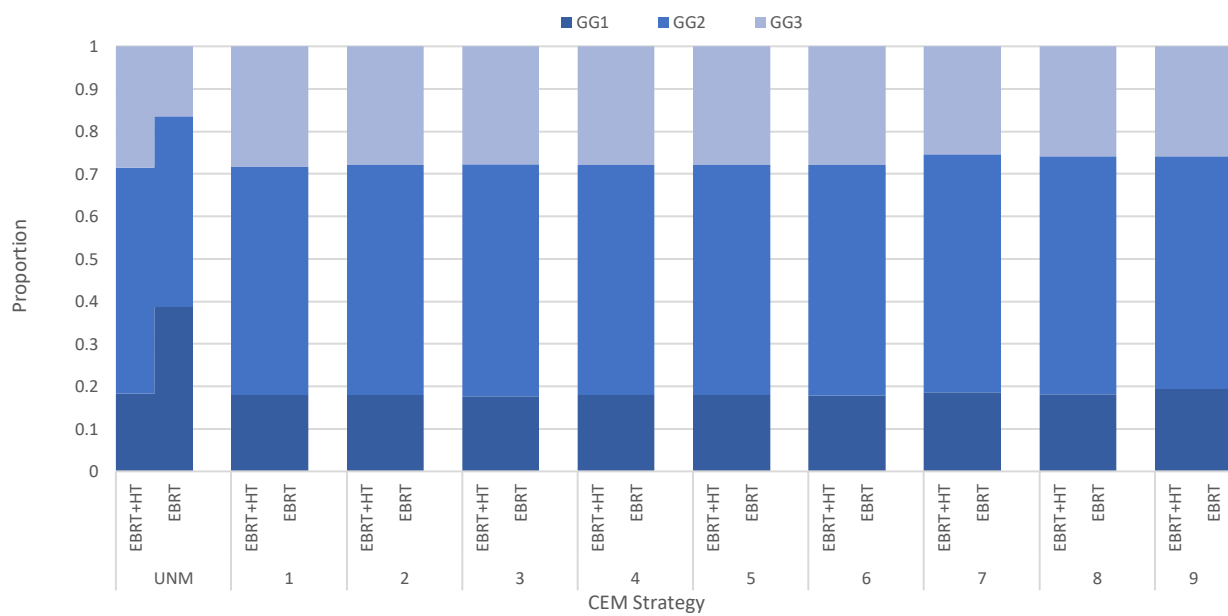

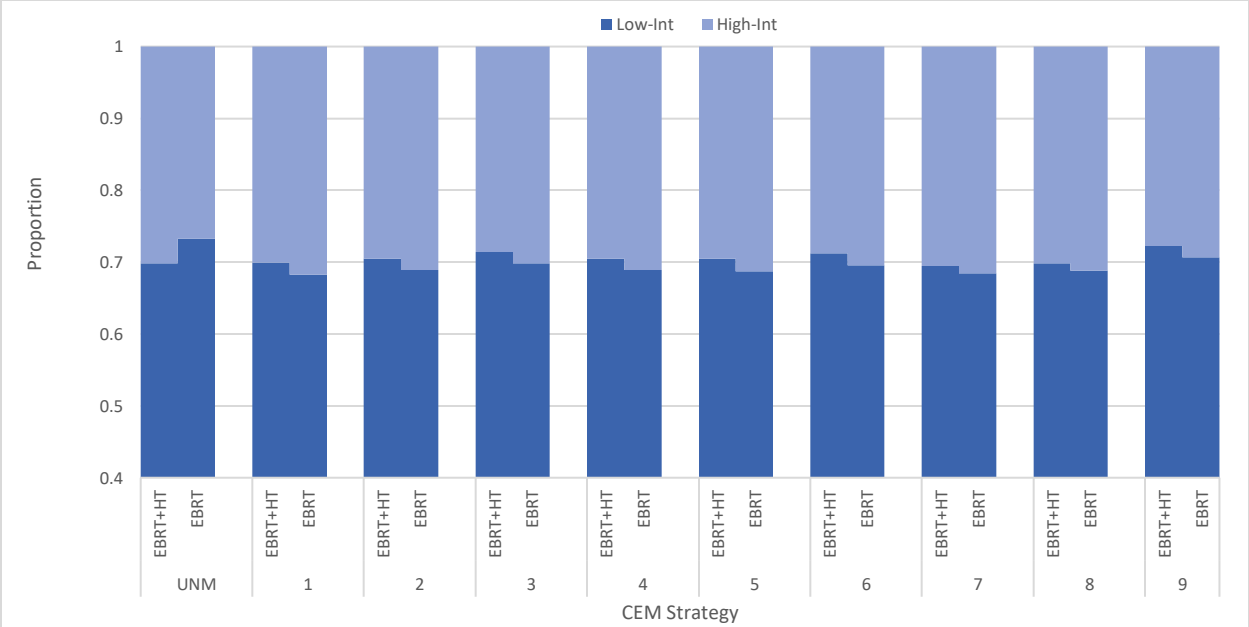

Figure E3b. Distribution of baseline covariates by CEM strategy for comparison two
